# Supplementary material for: BMI and BMI change following incident type 2 diabetes and risk of microvascular and macrovascular complications: the EPIC-Potsdam study
Source: PubMed Central journal article supplement (PMC7940263; doi:10.1007/s00125-020-05362-7), 2021-01-15
Supplement: 125_2020_5362_MOESM1_ESM.pdf [file 125_2020_5362_MOESM1_ESM.pdf]

## **Electronic Supplementary material**

### **BMI and BMI change following incident type 2 diabetes and risk of microvascular and macrovascular complications: the EPIC-Potsdam study**

Elli Polemiti; Julia Baudry; Olga Kuxhaus; Susanne Jäger; Manuela M. Bergmann; Cornelia Weikert; Matthias B. Schulze

Supplemental Tables, and Figures are ordered according to their citation in the main manuscript.

#### **Table of Contents**

##### **ESM Tables**

**ESM Table 1** Information collected at recruitment and at each follow-up in EPIC-Potsdam study

**ESM Table 2** Summary of missing information

**ESM Table 3** Characteristics of study participants according to pre-diagnosis BMI categories, among men

**ESM Table 4** Characteristics of study participants according to pre-diagnosis BMI categories, among women

**ESM Table 5** HRs and 95% CIs for microvascular and macrovascular complications of diabetes according to pre-diagnosis BMI (per 5 kg/m<sup>2</sup>), by sex

**ESM Table 6** HRs and 95% CIs for microvascular and macrovascular complications of diabetes according to pre-diagnosis BMI (per 5 kg/m<sup>2</sup>), by subgroups and sensitivity analyses

**ESM Table 7** HRs and 95% CIs for microvascular and macrovascular complications of diabetes according to pre-diagnosis BMI (categories and per 5 kg/m<sup>2</sup>), censored at first event

**ESM Table 8** HRs and 95% CIs for microvascular and macrovascular complications of diabetes per 1% relative BMI change per year, by sex

**ESM Table 9** HRs and 95% CIs for microvascular and macrovascular complications of diabetes per 1% relative BMI change per year, by subgroups and sensitivity analyses

**ESM Table 10** HRs and 95% CIs for microvascular and macrovascular complications of diabetes according to relative BMI change per year (categories and per 1%), censored at first event

## **ESM Figures**

**ESM Fig. 1** Flow chart of study sample derivation and number of microvascular and macrovascular complications of diabetes

**ESM Fig. 2** Study design

**ESM Fig. 3** Association between relative BMI change per year and risk of microvascular and macrovascular complications of diabetes

## ESM Tables

**ESM Table 1** Information collected at recruitment and at each follow-up in EPIC-Potsdam study

|                                                | <b>Recruitment assessment</b>                                                     |                                     | <b>Follow-up assessment</b>                                       |                                                                |                                                          |                                                                                                                 |
|------------------------------------------------|-----------------------------------------------------------------------------------|-------------------------------------|-------------------------------------------------------------------|----------------------------------------------------------------|----------------------------------------------------------|-----------------------------------------------------------------------------------------------------------------|
|                                                | 1994-1998                                                                         | 1 <sup>st</sup> (1997-2001)         | 2 <sup>nd</sup> (1999-2003)                                       | 3 <sup>rd</sup> (2001-2005)                                    | 4 <sup>th</sup> (2004-2008)                              | 5 <sup>th</sup> (2007-2009)                                                                                     |
| <b>Socio-demographics</b>                      | Age, sex, education                                                               |                                     |                                                                   |                                                                |                                                          |                                                                                                                 |
| <b>Lifestyle</b>                               | Dietary habits, Physical activity, alcohol consumption, smoking status & duration | Smoking status <sup>a</sup>         | Physical activity, alcohol consumption, smoking status & duration | Dietary habits, alcohol consumption, smoking status & duration | Physical activity, smoking status & duration             | Physical activity, alcohol consumption, smoking status & duration                                               |
| <b>Anthropometry &amp; Medical Information</b> | Weight, height, waist circumference, medical history, blood pressure              | Weight, medical history, medication | Weight, medical history, medication                               | Weight, medical history, medication                            | Weight, waist circumference, medical history, medication | Weight, medical history, medication, family history (mother, father, siblings) of MI, stroke or type 2 diabetes |

EPIC, European Prospective Investigation into Cancer and Nutrition; MI, Myocardial Infraction. <sup>a</sup>It was based on subsequent follow-up information on smoking status and year of giving up smoking.

**ESM Table 2** Summary of missing information<sup>a</sup>

| Variable                                                                                        | Missing frequency |
|-------------------------------------------------------------------------------------------------|-------------------|
|                                                                                                 | N (%)             |
| Smoking status, Follow-up 3                                                                     | 1 (0.07)          |
| Smoking status, Follow-up 5                                                                     | 1 (0.08)          |
| Years to heart failure diagnosis <sup>b,c,d</sup>                                               | 1 (2.50)          |
| Years to renal replacement therapy <sup>b,d</sup>                                               | 1 (25.00)         |
| Smoking status, Follow-up 2 <sup>b</sup>                                                        | 2 (0.15)          |
| Weight, kg, Follow-up 5                                                                         | 2 (0.16)          |
| Waist circumference, cm, EPIC-Potsdam baseline <sup>c</sup>                                     | 3 (0.22)          |
| Years to stroke diagnosis <sup>b,d</sup>                                                        | 3 (3.70)          |
| Years to last examination from treating physician <sup>b</sup>                                  | 5 (0.37)          |
| Years to myocardial infarction diagnosis <sup>b,d</sup>                                         | 5 (8.93)          |
| Weight, kg, EPIC-Potsdam baseline                                                               | 6 (0.44)          |
| Height                                                                                          | 8 (0.59)          |
| Sports, h/week, Follow-up 4                                                                     | 12 (0.90)         |
| Weight, kg, Follow-up 4                                                                         | 13 (0.98)         |
| Years to retinopathy diagnosis <sup>b,d</sup>                                                   | 13 (26.53)        |
| Waist circumference, cm, Follow-up 4 <sup>c</sup>                                               | 14 (1.05)         |
| Weight, kg, Follow-up 2                                                                         | 15 (1.10)         |
| Sports, h/week, Follow-up 2                                                                     | 16 (1.18)         |
| Biking, h/week, Follow-up 2                                                                     | 19 (1.40)         |
| Gardening, h/week, Follow-up 2                                                                  | 19 (1.40)         |
| Alcohol consumption, categories, Follow-up 2                                                    | 20 (1.47)         |
| Years to nephropathy diagnosis <sup>b,d</sup>                                                   | 26 (9.59)         |
| Smoking duration, years, EPIC-Potsdam baseline <sup>d</sup>                                     | 27 (3.22)         |
| Smoking duration, years, Follow-up 4 <sup>d</sup>                                               | 27 (3.31)         |
| Years to neuropathy diagnosis <sup>b,d</sup>                                                    | 28 (10.22)        |
| Smoking duration, years, Follow-up 3 <sup>d</sup>                                               | 28 (3.39)         |
| Smoking duration, years, Follow-up 5 <sup>d</sup>                                               | 28 (3.63)         |
| Smoking duration, years, Follow-up 2 <sup>d</sup>                                               | 29 (3.47)         |
| Smoking status, Follow-up 1                                                                     | 31 (2.28)         |
| Weight, kg, Follow-up 3                                                                         | 43 (3.19)         |
| Alcohol consumption, categories, Follow-up 3                                                    | 51 (3.79)         |
| Food items required for MedPyr score, Follow-up 3                                               | 51 (3.79)         |
| Systolic blood pressure, mmHg, at last examination with treating physicians <sup>c</sup>        | 56 (4.10)         |
| Diastolic blood pressure, mmHg, at last examination with treating physicians <sup>c</sup>       | 56 (4.10)         |
| Hemoglobin A1C, %, at last examination with treating physicians <sup>c</sup>                    | 61 (4.46)         |
| Weight, kg, Follow-up 1                                                                         | 65 (4.78)         |
| Sports, h/week, Follow-up 5                                                                     | 75 (5.93)         |
| Serum creatinine, $\mu\text{mol/l}$ , at last examination from treating physicians <sup>c</sup> | 89 (6.51)         |
| Family history for type 2 diabetes, myocardial infarction and stroke (parents and siblings)     | 102 (7.46)        |
| Weight at age 25 years, kg <sup>c</sup>                                                         | 124 (9.07)        |
| Weight at age 40 years, kg <sup>c</sup>                                                         | 164 (12.00)       |

Participants with missing information on the occurrence of outcomes were excluded (n=234). <sup>a</sup>Number of participants for each follow-up of the EPIC-Potsdam study: N<sub>EPIC-Potsdam baseline</sub>=1367; N<sub>follow-up1</sub>=1,361; N<sub>follow-up2</sub>=1358; N<sub>follow-up3</sub>=1346; N<sub>follow-up4</sub>=1329; N<sub>follow-up5</sub>=1265. <sup>b</sup>Years to event was calculate as the difference between date of diabetes and subsequent event. <sup>c</sup>Only used in the imputation model. <sup>d</sup>Percentages were calculated among participants with event or behaviour. Missing values were handled using multiple imputation (m=10) by chained equations, with imputation models specified for each variable with missing values separately. The variables were sorted by amount of missing values. Only missing values from completed follow-up rounds were imputed. For continuous variables Box-Cox transformation (for non-normally distributed variables) and the predictive mean matching method were performed. Multiple imputation was performed before the exclusion of prevalent cases. Thus, vascular complications with missing years to event would potentially become prevalent cases. The imputation model included the event indicators, years to event, covariates needed for the analyses model and predictors of incomplete variables.

**ESM Table 3** Characteristics of study participants according to pre-diagnosis BMI categories, among men

|                                                                  | Total<br>n=587     | Pre-diagnosis BMI category          |                                      |                                      |                                 |
|------------------------------------------------------------------|--------------------|-------------------------------------|--------------------------------------|--------------------------------------|---------------------------------|
|                                                                  |                    | 18.5-24.9 kg/m <sup>2</sup><br>n=46 | 25.0-29.9 kg/m <sup>2</sup><br>n=268 | 30.0-34.9 kg/m <sup>2</sup><br>n=215 | ≥35.0 kg/m <sup>2</sup><br>n=58 |
| Pre-diagnosis BMI, kg/m <sup>2</sup> , median (IQR)              | 29.8 (27.5-32.5)   | 24.2 (23.3-24.7)                    | 28.1 (26.9-29.1)                     | 32.1 (30.8-33.4)                     | 36.9 (35.8-39.6)                |
| Relative annual BMI change, %, median (IQR) <sup>a</sup>         | -0.4 (-1.7 to 0.9) | 0.2 (-1.2 to 2.0)                   | -0.3 (-1.5 to 0.8)                   | -0.6 (-2.1 to 0.7)                   | -0.3 (-2.0 to 1.1)              |
| Relative annual BMI change categories, <i>n</i> (%) <sup>a</sup> |                    |                                     |                                      |                                      |                                 |
| >1% BMI loss                                                     | 222 (37.8)         | 12 (26.7)                           | 95 (35.8)                            | 92 (43.2)                            | 23 (40.0)                       |
| No change                                                        | 223 (38.0)         | 16 (35.6)                           | 108 (40.8)                           | 79 (37.1)                            | 21 (36.2)                       |
| >1% BMI gain                                                     | 135 (23.3)         | 17 (37.8)                           | 62 (23.4)                            | 42 (19.7)                            | 14 (24.1)                       |
| <b>Demographics</b>                                              |                    |                                     |                                      |                                      |                                 |
| Age at pre-diagnosis BMI measurement, years, median (IQR)        | 58.4 (51.9-63.4)   | 58.6 (51.6-62.8)                    | 59.6 (54.2-64.2)                     | 56.8 (51.4-63.1)                     | 56.7 (50.7-62.1)                |
| Age at diabetes diagnosis, years, median (IQR)                   | 59.7 (53.1-64.9)   | 59.6 (52.6-63.7)                    | 60.7 (55.4- 65.3)                    | 57.6 (52.2-64.6)                     | 57.1 (51.0-63.3)                |
| Education, <i>n</i> (%)                                          |                    |                                     |                                      |                                      |                                 |
| No vocational training/vocational training                       | 227 (38.7)         | 11 (23.9)                           | 102 (38.1)                           | 89 (41.4)                            | 26 (44.8)                       |
| Technical college degree                                         | 121 (20.6)         | 11 (23.9)                           | 54 (20.1)                            | 42 (19.5)                            | 14 (24.1)                       |
| University degree                                                | 239 (40.7)         | 24 (52.2)                           | 112 (41.8)                           | 84 (39.1)                            | 19 (32.8)                       |
| <b>Pre-diagnosis lifestyle</b>                                   |                    |                                     |                                      |                                      |                                 |
| Physical activity, h/week, median (IQR)                          | 1.0 (0-3.0)        | 1.0 (0- 3.0)                        | 1.0 (0-3.0)                          | 1.0 (0-3.0)                          | 0.7 (0-3.0)                     |
| Alcohol intake, g/day, median (IQR)                              | 16.1 (7.5-33.3)    | 15.0 (9.9-30.4)                     | 17.0 (7.0-30.0)                      | 16.0 (8.0-36.8)                      | 15.2 (6.3-39.7)                 |
| MedPyr score, median (IQR)                                       | 6.7 (5.8-7.6)      | 6.7 (5.7-7.5)                       | 6.8 (5.7-7.5)                        | 6.7 (5.8-7.6)                        | 6.6 (5.9-7.6)                   |
| Smoking status, <i>n</i> (%)                                     |                    |                                     |                                      |                                      |                                 |
| Never-smoker                                                     | 136 (23.2)         | 10 (21.7)                           | 64 (23.9)                            | 47 (21.9)                            | 15 (25.9)                       |
| Former smoker                                                    | 337 (57.4)         | 22 (47.8)                           | 149 (55.6)                           | 130 (60.5)                           | 36 (62.1)                       |
| Current smoker                                                   | 114 (19.4)         | 14 (30.4)                           | 55 (20.5)                            | 38 (17.7)                            | 8 (13.8)                        |
| Smoking duration, years, median (IQR)                            | 24.0 (15.0- 33.0)  | 24.5 (15.0-34.3)                    | 25.0 (15.0-36.0)                     | 23.0 (16.0-32.0)                     | 24.0 (13.5-29.5)                |
| <b>Medical information, <i>n</i> (%)</b>                         |                    |                                     |                                      |                                      |                                 |
| Family history of diabetes                                       | 221 (37.6)         | 11 (23.9)                           | 100 (37.3)                           | 87 (40.5)                            | 24 (41.4)                       |
| Family history of MI                                             | 81 (13.8)          | 4 (8.7)                             | 34 (12.7)                            | 34 (15.8)                            | 9 (15.5)                        |
| Family history of stroke                                         | 101 (17.2)         | 8 (17.4)                            | 48 (18.0)                            | 36 (16.7)                            | 9 (15.5)                        |
| Hypertension                                                     | 474 (80.7)         | 30 (65.2)                           | 208 (77.6)                           | 180 (83.7)                           | 56 (96.6)                       |
| Dyslipidaemia                                                    | 431 (73.4)         | 29 (63.0)                           | 200 (74.6)                           | 167 (77.7)                           | 34 (58.6)                       |
| Insulin use at diabetes diagnosis                                | 49 (8.3)           | 5 (10.9)                            | 21 (7.8)                             | 21 (9.8)                             | 2 (3.4)                         |

Table presents combined rounded values from the ten imputation datasets. IQR, interquartile range; MI, myocardial infarction. <sup>a</sup>7 participants did not have follow-up after diabetes diagnosis.

**ESM Table 4** Characteristics of study participants according to pre-diagnosis BMI categories, among women

|                                                                  | Total<br>n=497     | Pre-diagnosis BMI category          |                                      |                                      |                                 |
|------------------------------------------------------------------|--------------------|-------------------------------------|--------------------------------------|--------------------------------------|---------------------------------|
|                                                                  |                    | 18.5-24.9 kg/m <sup>2</sup><br>n=53 | 25.0-29.9 kg/m <sup>2</sup><br>n=185 | 30.0-34.9 kg/m <sup>2</sup><br>n=163 | ≥35.0 kg/m <sup>2</sup><br>n=96 |
| Pre-diagnosis BMI, kg/m <sup>2</sup> , median (IQR)              | 30.3 (27.2-34.1)   | 23.7 (22.0-24.2)                    | 27.7 (26.6-29.0)                     | 32.2 (31.1-33.8)                     | 38.3 (36.4-41.2)                |
| Relative annual BMI change, %, median (IQR) <sup>a</sup>         | -0.4 (-2.3 to 0.8) | -0.8 (-2.3 to 0.3)                  | -0.2 (-2.2 to 1.0)                   | -0.3 (-2.2 to 1.3)                   | -0.7 (-2.7 to 0.5)              |
| Relative annual BMI change categories, <i>n</i> (%) <sup>a</sup> |                    |                                     |                                      |                                      |                                 |
| >1% BMI loss                                                     | 199 (40.6)         | 24 (46.2)                           | 67 (36.8)                            | 62 (38.8)                            | 46 (47.9)                       |
| No change                                                        | 179 (36.5)         | 19 (36.5)                           | 70 (37.8)                            | 54 (33.8)                            | 35 (36.5)                       |
| >1% BMI gain                                                     | 112 (22.9)         | 9 (17.3)                            | 45 (24.3)                            | 44 (27.5)                            | 15 (15.6)                       |
| <b>Demographics</b>                                              |                    |                                     |                                      |                                      |                                 |
| Age at pre-diagnosis BMI measurement, years, median (IQR)        | 60.1 (52.3-65.0)   | 57.5 (50.1-63.4)                    | 61.6 (55.2-65.4)                     | 60.8 (52.4-65.2)                     | 57.9 (50.3-63.2)                |
| Age at diabetes diagnosis, years, median (IQR)                   | 61.2 (54.0-66.3)   | 58.5 (50.9-64.7)                    | 63.1 (56.6-67.2)                     | 61.7 (54.2-66.6)                     | 58.8 (51.4-64.6)                |
| Education, <i>n</i> (%)                                          |                    |                                     |                                      |                                      |                                 |
| No vocational training/vocational training                       | 263 (52.9)         | 24 (45.3)                           | 86 (46.5)                            | 95 (58.3)                            | 58 (60.4)                       |
| Technical college degree                                         | 153 (30.8)         | 17 (32.1)                           | 64 (34.6)                            | 48 (29.4)                            | 26 (27.1)                       |
| University degree                                                | 81 (16.3)          | 12 (22.6)                           | 37 (20.0)                            | 20 (12.3)                            | 12 (12.5)                       |
| <b>Pre-diagnosis lifestyle</b>                                   |                    |                                     |                                      |                                      |                                 |
| Physical activity, h/week, median (IQR)                          | 1.0 (0-3.5)        | 1.0 (0-4.0)                         | 1.0 (0-3.5)                          | 1.0 (0-3.6)                          | 0.6 (0-2.6)                     |
| Alcohol intake, g/day, median (IQR)                              | 4.3 (1.5-9.4)      | 5.5 (1.7-12.0)                      | 5.5 (1.6-10.8)                       | 3.3 (1.6-7.1)                        | 2.9 (1.4-7.5)                   |
| MedPyr score, median (IQR)                                       | 6.7 (5.8-7.5)      | 6.9 (5.9-7.6)                       | 6.7 (6.0-7.5)                        | 6.5 (5.8-7.3)                        | 7.0 (5.8-7.7)                   |
| Smoking status, <i>n</i> (%)                                     |                    |                                     |                                      |                                      |                                 |
| Never-smoker                                                     | 292 (58.8)         | 31 (58.5)                           | 108 (58.4)                           | 100 (61.3)                           | 53 (55.2)                       |
| Former smoker                                                    | 137 (27.6)         | 12 (22.6)                           | 51 (27.6)                            | 44 (27.0)                            | 29 (30.2)                       |
| Current smoker                                                   | 68 (13.7)          | 10 (18.9)                           | 25 (13.5)                            | 18 (11.0)                            | 15 (15.6)                       |
| Smoking duration, years, median (IQR)                            | 24.0 (12.6-33.0)   | 20.8 (4.0-31.8)                     | 24.0 (13.5-33.5)                     | 20.5 (12.0-33.5)                     | 27.5 (15.5-32.5)                |
| <b>Medical information, <i>n</i> (%)</b>                         |                    |                                     |                                      |                                      |                                 |
| Family history of diabetes                                       | 262 (52.7)         | 32 (60.4)                           | 96 (51.9)                            | 83 (50.9)                            | 53 (55.2)                       |
| Family history of MI                                             | 100 (20.1)         | 9 (17.0)                            | 43 (23.2)                            | 30 (18.4)                            | 18 (18.8)                       |
| Family history of stroke                                         | 121 (24.3)         | 14 (26.4)                           | 51 (27.6)                            | 35 (21.5)                            | 22 (22.9)                       |
| Hypertension                                                     | 396 (79.7)         | 34 (64.2)                           | 135 (73.0)                           | 137 (84.0)                           | 90 (93.8)                       |
| Dyslipidaemia                                                    | 365 (73.4)         | 35 (66.0)                           | 148 (80.0)                           | 118 (72.4)                           | 65 (67.7)                       |
| Insulin use at diabetes diagnosis                                | 36 (7.2)           | 4 (7.5)                             | 8 (4.3)                              | 18 (11.0)                            | 5 (5.2)                         |

Table presents combined rounded values from the ten imputation datasets. IQR, interquartile range; MI, myocardial infarction. <sup>a</sup>7 participants did not have follow-up after diabetes diagnosis.

**ESM Table 5** HRs and 95% CIs for microvascular and macrovascular complications of diabetes according to pre-diagnosis BMI (per 5 kg/m<sup>2</sup>), by sex

|                                    | Men               | Women             |
|------------------------------------|-------------------|-------------------|
| <b>Total complications</b>         |                   |                   |
| No. of cases / person-years        | 241 / 6354.6      | 155 / 5270.4      |
| Age-adjusted model                 | 1.14 (0.99, 1.32) | 1.18 (0.99, 1.40) |
| Model 2                            | 1.17 (1.00, 1.36) | 1.21 (1.00, 1.45) |
| Model 3                            | 1.17 (1.00, 1.38) | 1.19 (0.99, 1.43) |
| <b>Macrovascular complications</b> |                   |                   |
| No. of cases / person-years        | 57 / 6878.4       | 28 / 5638.8       |
| Age-adjusted model                 | 1.05 (0.75, 1.49) | 0.93 (0.60, 1.45) |
| Model 2                            | 1.06 (0.74, 1.51) | 1.02 (0.63, 1.67) |
| Model 3                            | 1.01 (0.69, 1.46) | 0.93 (0.53, 1.62) |
| <b>Microvascular complications</b> |                   |                   |
| No. of cases / person-years        | 206 / 6579.4      | 142 / 5389.3      |
| Age-adjusted model                 | 1.17 (1.00, 1.38) | 1.22 (1.02, 1.46) |
| Model 2                            | 1.22 (1.02, 1.45) | 1.24 (1.02, 1.51) |
| Model 3                            | 1.24 (1.03, 1.5)  | 1.22 (1.00, 1.50) |
| <b>Kidney disease</b>              |                   |                   |
| No. of cases / person-years        | 124 / 6864.6      | 83 / 5589.2       |
| Age-adjusted model                 | 1.38 (1.12, 1.69) | 1.32 (1.05, 1.64) |
| Model 2                            | 1.50 (1.21, 1.87) | 1.32 (1.01, 1.73) |
| Model 3                            | 1.54 (1.22, 1.94) | 1.30 (0.98, 1.71) |
| <b>Neuropathy</b>                  |                   |                   |
| No. of cases / person-years        | 119 / 6868.6      | 92 / 5570.4       |
| Age-adjusted model                 | 0.99 (0.79, 1.24) | 1.23 (0.98, 1.56) |
| Model 2                            | 1.03 (0.81, 1.31) | 1.22 (0.96, 1.54) |
| Model 3                            | 1.00 (0.77, 1.29) | 1.20 (0.95, 1.52) |

Table presents combined rounded values from the ten imputation datasets. Model 2: age-adjusted model + education, smoking status, smoking duration, physical activity, alcohol consumption, MedPyr score, family history of diabetes, MI and stroke; Model 3: Model 2 + prevalent conditions of hypertension and dyslipidaemia. Likelihood ratio test for interaction term: Total complications:  $p=0.96$ ; Macrovascular complications:  $p=0.48$ ; Microvascular complications:  $p=0.86$ ; Kidney disease:  $p=0.64$ ; Neuropathy:  $p=0.30$ .

**ESM Table 6** HRs and 95% CIs for microvascular and macrovascular complications of diabetes according to pre-diagnosis BMI (per 5 kg/m<sup>2</sup>), by subgroups and sensitivity analyses

|                                 | <b>Total complications</b> | <b>Macrovascular</b> | <b>Microvascular</b> | <b>Kidney disease</b> | <b>Neuropathy</b> |
|---------------------------------|----------------------------|----------------------|----------------------|-----------------------|-------------------|
| <b>Excluding early outcomes</b> |                            |                      |                      |                       |                   |
| No. of cases / person-years     | 369 / 11,595.3             | 70 / 12,504.8        | 333 / 11,953.9       | 199 / 12,599.7        | 205 / 12,581.7    |
| Age- and sex- adjusted model    | 1.17 (1.05, 1.31)          | 1.01 (0.76, 1.36)    | 1.20 (1.06, 1.35)    | 1.38 (1.20, 1.59)     | 1.11 (0.94, 1.30) |
| Model 2                         | 1.19 (1.06, 1.32)          | 1.05 (0.79, 1.40)    | 1.21 (1.07, 1.37)    | 1.40 (1.21, 1.61)     | 1.12 (0.96, 1.32) |
| <b>Excluding insulin users</b>  |                            |                      |                      |                       |                   |
| No. of cases / person-years     | 351 / 10,816.9             | 77 / 11,601.6        | 306 / 11,273.3       | 186 / 11,685.0        | 181 / 11,693.7    |
| Age- and sex- adjusted model    | 1.14 (1.02, 1.28)          | 1.03 (0.78, 1.37)    | 1.18 (1.04, 1.33)    | 1.29 (1.11, 1.49)     | 1.09 (0.93, 1.28) |
| Model 2                         | 1.15 (1.03, 1.29)          | 1.07 (0.81, 1.42)    | 1.18 (1.04, 1.34)    | 1.30 (1.11, 1.52)     | 1.10 (0.94, 1.30) |
| <b>Never smoker</b>             |                            |                      |                      |                       |                   |
| No. of cases / person-years     | 136 / 4671.6               | 22 / 4982.3          | 127 / 4801.0         | 77 / 4955.4           | 77 / 4983.5       |
| Age- and sex- adjusted model    | 1.19 (0.97, 1.45)          | - <sup>a</sup>       | 1.17 (0.95, 1.44)    | 1.24 (0.96, 1.60)     | 1.16 (0.88, 1.53) |
| Model 2                         | 1.20 (0.98, 1.46)          | - <sup>a</sup>       | 1.16 (0.94, 1.43)    | 1.20 (0.93, 1.58)     | 1.12 (0.84, 1.49) |
| <b>Former smoker</b>            |                            |                      |                      |                       |                   |
| No. of cases / person-years     | 185 / 5157.3               | 42 / 5584.1          | 157 / 5399.1         | 98 / 5624.8           | 94 / 5626.7       |
| Age- and sex- adjusted model    | 1.21 (1.02, 1.43)          | - <sup>a</sup>       | 1.29 (1.08, 1.55)    | 1.51 (1.24, 1.85)     | 1.16 (0.92, 1.47) |
| Model 2                         | 1.20 (1.00, 1.44)          | - <sup>a</sup>       | 1.31 (1.07, 1.61)    | 1.64 (1.30, 2.06)     | 1.18 (0.91, 1.52) |
| <b>Current smoker</b>           |                            |                      |                      |                       |                   |
| No. of cases / person-years     | 75 / 1794.6                | 21 / 1953.2          | 65 / 1920.6          | 32 / 2026.4           | 41 / 1980.5       |
| Age- and sex- adjusted model    | 1.10 (0.85, 1.42)          | 1.21 (0.75, 1.97)    | 1.08 (0.81, 1.45)    | 1.52 (1.05, 2.20)     | 1.04 (0.72, 1.50) |
| Model 2                         | 1.21 (0.87, 1.67)          | 1.38 (0.57, 3.31)    | 1.19 (0.85, 1.66)    | 1.77 (1.08, 2.90)     | 1.31 (0.81, 2.13) |
| <b>Age at diagnosis &lt;65y</b> |                            |                      |                      |                       |                   |
| No. of cases / person-years     | 276 / 8960.6               | 51 / 9612.6          | 247 / 9294.9         | 140 / 9671.8          | 155 / 9608.6      |
| Age- and sex- adjusted model    | 1.19 (1.05, 1.34)          | 1.00 (0.72, 1.37)    | 1.20 (1.05, 1.38)    | 1.47 (1.25, 1.74)     | 1.07 (0.89, 1.29) |
| Model 2                         | 1.18 (1.05, 1.33)          | 1.03 (0.74, 1.44)    | 1.20 (1.04, 1.37)    | 1.50 (1.26, 1.79)     | 1.06 (0.89, 1.27) |
| <b>Age at diagnosis ≥65y</b>    |                            |                      |                      |                       |                   |
| No. of cases / person-years     | 119 / 2664.9               | 34 / 2904.0          | 101 / 2828.2         | 67 / 2935.0           | 57 / 2982.5       |
| Age- and sex- adjusted model    | 1.14 (0.91, 1.43)          | 1.05 (0.65, 1.69)    | 1.23 (0.97, 1.55)    | 1.18 (0.91, 1.55)     | 1.32 (0.98, 1.78) |
| Model 2                         | 1.17 (0.92, 1.48)          | 1.14 (0.68, 1.89)    | 1.25 (0.97, 1.61)    | 1.23 (0.91, 1.67)     | 1.42 (1.02, 1.99) |

Table presents combined rounded values from the ten imputation datasets. Model 2: age- and sex-adjusted model + education, smoking status, smoking duration, physical activity, alcohol consumption, MedPyr score, family history of diabetes, MI and stroke. <sup>a</sup>HR (95% CI) is not reported where violation of linearity assumption was found. Likelihood ratio test for interaction term for smoking status: Total complications:  $p=0.76$ ; Microvascular complications:  $p=0.72$ ; Microvascular complications:  $p=0.48$ ; Kidney disease:  $p=0.24$ ; Neuropathy:  $p=0.99$ . Likelihood ratio test for interaction term for age at diabetes diagnosis: Total complications:  $p=0.36$ ; Macrovascular complications:  $p=0.74$ ; Microvascular complications:  $p=0.82$ ; Kidney disease:  $p=0.93$ ; Neuropathy:  $p=0.93$ .



**ESM Table 7** HRs and 95% CIs for microvascular and macrovascular complications of diabetes according to pre-diagnosis BMI (categories and per 5 kg/m<sup>2</sup>), censored at first event

|                                    | <b>BMI category</b>                       |                                            |                                            |                                        | <b>Continuous BMI,</b>                  |
|------------------------------------|-------------------------------------------|--------------------------------------------|--------------------------------------------|----------------------------------------|-----------------------------------------|
|                                    | <b>18.5-24.9 kg/m<sup>2</sup></b><br>n=99 | <b>25.0-29.9 kg/m<sup>2</sup></b><br>n=452 | <b>30.0-34.9 kg/m<sup>2</sup></b><br>n=377 | <b>≥35.0 kg/m<sup>2</sup></b><br>n=155 | <b>per 5 kg/m<sup>2</sup></b><br>n=1083 |
| <b>Macrovascular complications</b> |                                           |                                            |                                            |                                        |                                         |
| No. of cases / person-years        | 6 / 1073.9                                | 34 / 4844.6                                | 26 / 4047.2                                | 8 / 1663.1                             | 74 / 11,623.9                           |
| Age- and sex-adjusted model        | 1.00 (Ref.)                               | 0.95 (0.39, 2.30)                          | 0.97 (0.40, 2.39)                          | 0.82 (0.27, 2.47)                      | 1.03 (0.78, 1.37)                       |
| Model 2                            | 1.00 (Ref.)                               | 0.99 (0.41, 2.42)                          | 1.00 (0.39, 2.53)                          | 0.86 (0.29, 2.61)                      | 1.03 (0.78, 1.37)                       |
| Model 3                            | 1.00 (Ref.)                               | 0.94 (0.38, 2.32)                          | 0.90 (0.35, 2.32)                          | 0.75 (0.24, 2.33)                      | 0.97 (0.72, 1.31)                       |
| <b>Microvascular complications</b> |                                           |                                            |                                            |                                        |                                         |
| No. of cases / person-years        | 18 / 1073.9                               | 125 / 4844.6                               | 121 / 4047.2                               | 58 / 1663.1                            | 321 / 11,623.9                          |
| Age- and sex-adjusted model        | 1.00 (Ref.)                               | 1.39 (0.82, 2.34)                          | 1.70 (1.01, 2.86)                          | 2.26 (1.30, 3.93)                      | 1.20 (1.07, 1.36)                       |
| Model 2                            | 1.00 (Ref.)                               | 1.39 (0.81, 2.38)                          | 1.76 (1.03, 3.02)                          | 2.42 (1.36, 4.31)                      | 1.21 (1.08, 1.37)                       |
| Model 3                            | 1.00 (Ref.)                               | 1.32 (0.76, 2.29)                          | 1.71 (0.98, 2.96)                          | 2.68 (1.48, 4.83)                      | 1.26 (1.11, 1.42)                       |
| <b>Kidney disease</b>              |                                           |                                            |                                            |                                        |                                         |
| No. of cases / person-years        | 8 / 1073.9                                | 56 / 4844.6                                | 63 / 4047.2                                | 31 / 1663.1                            | 157 / 11,623.9                          |
| Age- and sex-adjusted model        | 1.00 (Ref.)                               | 1.52 (0.72, 3.19)                          | 2.11 (1.01, 4.41)                          | 2.92 (1.3, 6.54)                       | 1.36 (1.16, 1.60)                       |
| Model 2                            | 1.00 (Ref.)                               | 1.63 (0.76, 3.48)                          | 2.36 (1.10, 5.06)                          | 3.44 (1.47, 8.03)                      | 1.39 (1.18, 1.64)                       |
| Model 3                            | 1.00 (Ref.)                               | 1.55 (0.71, 3.38)                          | 2.26 (1.04, 4.92)                          | 3.68 (1.52, 8.90)                      | 1.43 (1.20, 1.69)                       |
| <b>Neuropathy</b>                  |                                           |                                            |                                            |                                        |                                         |
| No. of cases / person-years        | 9 / 1073.9                                | 67 / 4844.6                                | 54 / 4047.2                                | 24 / 1663.1                            | 154 / 11,623.9                          |
| Age- and sex-adjusted model        | 1.00 (Ref.)                               | 1.34 (0.64, 2.79)                          | 1.48 (0.72, 3.05)                          | 1.76 (0.80, 3.87)                      | 1.07 (0.90, 1.27)                       |
| Model 2                            | 1.00 (Ref.)                               | 1.29 (0.60, 2.81)                          | 1.49 (0.69, 3.19)                          | 1.79 (0.79, 4.10)                      | 1.07 (0.90, 1.28)                       |
| Model 3                            | 1.00 (Ref.)                               | 1.22 (0.56, 2.66)                          | 1.43 (0.67, 3.07)                          | 1.95 (0.86, 4.43)                      | 1.09 (0.91, 1.31)                       |

Table presents combined rounded values from the ten imputation datasets. Model 2: age- and sex-adjusted model + education, smoking status, smoking duration, physical activity, alcohol consumption, MedPyr score, family history of diabetes, myocardial infarction and stroke; Model 3: Model 2 + prevalent conditions of hypertension and dyslipidaemia

**ESM Table 8** HRs and 95% CIs for microvascular and macrovascular complications of diabetes per 1% relative BMI change per year, by sex

|                                    | Men               | Women             |
|------------------------------------|-------------------|-------------------|
| <b>Total complications</b>         |                   |                   |
| No. of cases / person-years        | 235 / 6319.0      | 145 / 5249.3      |
| Model 1                            | 1.03 (0.98, 1.09) | 1.04 (0.97, 1.12) |
| Model 2                            | 1.03 (0.97, 1.08) | 1.05 (0.98, 1.13) |
| <b>Macrovascular complications</b> |                   |                   |
| No. of cases / person-years        | 55 / 6841.7       | 22 / 5606.8       |
| Model 1                            | 0.96 (0.85, 1.07) | 0.86 (0.74, 0.99) |
| Model 2                            | 0.98 (0.87, 1.11) | 0.85 (0.73, 1.00) |
| <b>Microvascular complications</b> |                   |                   |
| No. of cases / person-years        | 203 / 6644.4      | 139 / 5423.3      |
| Model 1                            | 1.06 (1.01, 1.12) | 1.07 (0.99, 1.16) |
| Model 2                            | 1.05 (0.99, 1.12) | 1.06 (0.98, 1.15) |
| <b>Kidney disease</b>              |                   |                   |
| No. of cases / person-years        | 122 / 6925.9      | 80 / 5624.8       |
| Model 1                            | 1.07 (1.00, 1.16) | 1.06 (0.95, 1.18) |
| Model 2                            | 1.07 (0.98, 1.15) | 1.04 (0.93, 1.16) |
| <b>Neuropathy</b>                  |                   |                   |
| No. of cases / person-years        | 118 / 6936.1      | 91 / 5590.7       |
| Model 1                            | 1.07 (1.00, 1.14) | 1.09 (1.00, 1.18) |
| Model 2                            | 1.06 (0.99, 1.14) | 1.09 (0.99, 1.19) |

Table presents combined rounded values from the ten imputation datasets. Model 1: adjusted for age and pre-diagnosis BMI; Model 2: Model 1 + education, smoking status change, smoking duration at pre-diagnosis, smoking duration change, physical activity at pre-diagnosis, physical activity change, alcohol consumption at pre-diagnosis, alcohol consumption change, MedPyr score, lipid-lowering medication, antihypertensive medication, glucose-lowering medication. For models of total complications 4 men/ 6 women were excluded because they developed a complication between diabetes diagnosis and next follow-up; for macrovascular complications 1 man/ 5 women; for microvascular complications 3men/ 1 woman; for kidney disease 2men/ 1woman; for neuropathy 1man/ 1 woman. Likelihood ratio test for interaction term: Total complications:  $p=0.78$ ; Macrovascular complications:  $p<0.001$ ; Microvascular complications:  $p=0.53$ ; Kidney disease:  $p=0.64$ ; Neuropathy:  $p=0.13$ .

**ESM Table 9** HRs and 95% CIs for microvascular and macrovascular complications of diabetes per 1% relative BMI change per year, by subgroups and sensitivity analyses

|                                                    | <b>Total complications</b> | <b>Macrovascular</b> | <b>Microvascular</b> | <b>Kidney disease</b> | <b>Neuropathy</b> |
|----------------------------------------------------|----------------------------|----------------------|----------------------|-----------------------|-------------------|
| <b>Excluding insulin users</b>                     |                            |                      |                      |                       |                   |
| No. of cases / person-years                        | 338 / 10,769.5             | 69 / 11,538.6        | 300 / 11,230.5       | 182 / 11,637.7        | 180 / 11,641.0    |
| Model 1                                            | 1.03 (0.98, 1.07)          | 0.92 (0.83, 1.01)    | 1.06 (1.01, 1.11)    | 1.07 (1.00, 1.14)     | 1.05 (1.00, 1.11) |
| Model 2                                            | 1.02 (0.98, 1.06)          | 0.94 (0.86, 1.03)    | 1.05 (1.00, 1.10)    | 1.07 (1.00, 1.14)     | 1.04 (0.98, 1.10) |
| <b>Never smoker<sup>a</sup></b>                    |                            |                      |                      |                       |                   |
| No. of cases / person-years                        | 128 / 4650.0               | 18 / 4652.1          | 123 / 4734.8         | 73 / 4889.7           | 76 / 4906.1       |
| Model 1                                            | 1.10 (1.01, 1.19)          | 0.84 (0.68, 1.03)    | 1.16 (1.07, 1.26)    | 1.15 (1.04, 1.28)     | 1.16 (1.04, 1.29) |
| Model 2                                            | 1.09 (1.01, 1.18)          | 0.78 (0.62, 0.97)    | 1.15 (1.06, 1.25)    | 1.13 (1.02, 1.25)     | 1.16 (1.04, 1.29) |
| <b>Former smoker<sup>a</sup></b>                   |                            |                      |                      |                       |                   |
| No. of cases / person-years                        | 174 / 5032.2               | 38 / 5033.6          | 149 / 5373.0         | 93 / 5415.8           | 91 / 5419.4       |
| Model 1                                            | 1.01 (0.96, 1.07)          | 0.96 (0.84, 1.10)    | 1.03 (0.97, 1.10)    | 1.10 (1.00, 1.22)     | 1.02 (0.94, 1.10) |
| Model 2                                            | 1.00 (0.94, 1.07)          | 0.94 (0.83, 1.06)    | 1.02 (0.95, 1.09)    | 1.08 (0.98, 1.20)     | 1.01 (0.93, 1.11) |
| <b>Current smoker<sup>a</sup></b>                  |                            |                      |                      |                       |                   |
| No. of cases / person-years                        | 58 / 1787.1                | 19 / 1369.7          | 49 / 1465.4          | 23 / 1543.7           | 33 / 1507.5       |
| Model 1                                            | 0.91 (0.78, 1.06)          | 1.05 (0.84, 1.32)    | 0.86 (0.69, 1.06)    | 0.85 (0.68, 1.06)     | 0.86 (0.66, 1.12) |
| Model 2                                            | 0.89 (0.74, 1.07)          | <sub>b</sub>         | 0.78 (0.61, 1.01)    | <sub>b</sub>          | <sub>b</sub>      |
| <b>Age at diagnosis &lt;65y</b>                    |                            |                      |                      |                       |                   |
| No. of cases / person-years                        | 271 / 8949.8               | 49 / 9605.6          | 244 / 9285.7         | 138 / 9664.4          | 153 / 9603.9      |
| Model 1                                            | 1.02 (0.97, 1.07)          | 0.87 (0.80, 0.95)    | 1.06 (1.01, 1.11)    | 1.05 (0.98, 1.13)     | 1.06 (1.00, 1.12) |
| Model 2                                            | 1.03 (0.95, 1.12)          | 0.89 (0.81, 0.98)    | 1.05 (1.00, 1.11)    | 1.04 (0.97, 1.12)     | 1.05 (0.98, 1.11) |
| <b>Age at diagnosis ≥65y</b>                       |                            |                      |                      |                       |                   |
| No. of cases / person-years                        | 109 / 2617.3               | 28 / 2840.0          | 97 / 2784.3          | 64 / 2887.1           | 56 / 2926.6       |
| Model 1                                            | 1.08 (1.00, 1.16)          | 1.08 (0.91, 1.27)    | 1.07 (0.99, 1.17)    | 1.13 (1.01, 1.26)     | 1.06 (0.97, 1.16) |
| Model 2                                            | 1.02 (0.94, 1.11)          | 0.99 (0.84, 1.16)    | 1.03 (0.94, 1.13)    | 1.08 (0.95, 1.23)     | 1.11 (1.00, 1.22) |
| <b>Pre-diagnosis BMI &lt;30.0 kg/m<sup>2</sup></b> |                            |                      |                      |                       |                   |
| No. of cases / person-years                        | 176 / 5899.7               | 40 / 6290.1          | 156 / 6182.0         | 83 / 6428.7           | 101 / 6352.6      |
| Model 1                                            | 1.05 (0.99, 1.12)          | 0.96 (0.83, 1.12)    | 1.09 (1.02, 1.16)    | 1.14 (1.04, 1.25)     | 1.06 (0.99, 1.14) |
| Model 2                                            | 1.05 (0.98, 1.12)          | 0.97 (0.86, 1.11)    | 1.09 (1.01, 1.17)    | 1.15 (1.03, 1.29)     | 1.06 (0.98, 1.14) |

Continued

ESM Table 9 continued

|                                                                  | <b>Total complications</b> | <b>Macrovascular</b> | <b>Microvascular</b> | <b>Kidney disease</b> | <b>Neuropathy</b> |
|------------------------------------------------------------------|----------------------------|----------------------|----------------------|-----------------------|-------------------|
| <b>Pre-diagnosis BMI <math>\geq 30.0</math> kg/m<sup>2</sup></b> |                            |                      |                      |                       |                   |
| No. of cases / person-years                                      | 204 / 5665.7               | 37 / 6154.7          | 185 / 5884.6         | 118 / 6117.0          | 108 / 6167.9      |
| Model 1                                                          | 1.03 (0.98, 1.09)          | 0.90 (0.82, 0.99)    | 1.06 (1.00, 1.13)    | 1.04 (0.96, 1.12)     | 1.11 (1.02, 1.20) |
| Model 2                                                          | 1.02 (0.97, 1.08)          | 0.95 (0.84, 1.06)    | 1.05 (0.99, 1.11)    | 1.04 (0.96, 1.12)     | 1.08 (0.99, 1.17) |
| <b>No glucose-lowering medication at diagnosis</b>               |                            |                      |                      |                       |                   |
| No. of cases / person-years                                      | 96 / 3616.2                | 16 / 3843.2          | 85 / 3780.9          | 56 / 3895.5           | 45 / 3894.5       |
| Model 1                                                          | 1.05 (0.96, 1.14)          | 0.85 (0.68, 1.05)    | 1.09 (0.99, 1.20)    | 1.12 (0.97, 1.29)     | - <sup>c</sup>    |
| Model 2                                                          | 1.06 (0.98, 1.16)          | 0.74 (0.55, 0.99)    | 1.12 (1.02, 1.23)    | 1.13 (0.99, 1.29)     | - <sup>c</sup>    |
| <b>Glucose-lowering medication at diagnosis<sup>d</sup></b>      |                            |                      |                      |                       |                   |
| No. of cases / person-years                                      | 242 / 7156.0               | 53 / 7697.6          | 216 / 7450.4         | 126 / 7742.9          | 135 / 7746.5      |
| Model 1                                                          | 1.00 (0.95, 1.06)          | 0.94 (0.84, 1.05)    | 1.03 (0.97, 1.09)    | 1.05 (0.98, 1.13)     | 1.04 (0.97, 1.11) |
| Model 2                                                          | 1.00 (0.95, 1.06)          | 0.95 (0.86, 1.05)    | 1.02 (0.96, 1.08)    | 1.05 (0.98, 1.14)     | 1.03 (0.96, 1.11) |

Table presents combined rounded values from the ten imputation datasets. Model 1: adjusted for age, sex and BMI at diabetes diagnosis; Model 2: Model 1 + education, smoking status change, smoking duration at pre-diagnosis, smoking duration change, physical activity at pre-diagnosis, physical activity change, alcohol consumption at pre-diagnosis, alcohol consumption change, MedPyr score, lipid-lowering medication, antihypertensive medication, glucose-lowering medication. <sup>a</sup>Participants who changed smoking status were excluded. <sup>b</sup>HR (95% CI) is not reported due to sparse data. <sup>c</sup>HR (95% CI) is not reported where violation of linearity assumption was found. <sup>d</sup>Insulin users were excluded.

Likelihood ratio test for interaction for smoking status: Total complications:  $p=0.09$ ; Macrovascular complications:  $p=0.74$ ; Microvascular complications:  $p=0.02$ ; Kidney disease:  $p=0.34$ ; Neuropathy:  $p=0.04$ . Likelihood ratio test for interaction for age at diabetes diagnosis: Total complications:  $p=0.04$ ; Macrovascular complications:  $p=0.35$ ; Microvascular complications:  $p=0.11$ ; Kidney disease:  $p=0.001$ ; Neuropathy:  $p=0.75$ . Likelihood ratio test for interaction term for pre-diagnosis BMI: Total complications:  $p=0.44$ ; Macrovascular complications:  $p=0.67$ ; Microvascular complications:  $p=0.05$ ; Kidney disease:  $p=0.03$ ; Neuropathy:  $p=0.83$ . Likelihood ratio test for interaction term for glucose-lowering medication at diabetes diagnosis: Total complications:  $p=0.27$ ; Macrovascular complications:  $p=0.53$ ; Microvascular complications:  $p=0.26$ ; Kidney disease:  $p=0.28$ ; Neuropathy:  $p=0.86$ .

**ESM Table 10** HRs and 95% CIs for microvascular and macrovascular complications of diabetes according to relative BMI change per year (categories and per 1%), censored at first event

|                                    | <b>BMI change category</b>      |                                        |                                 | <b>Continuous BMI change,</b>     |
|------------------------------------|---------------------------------|----------------------------------------|---------------------------------|-----------------------------------|
|                                    | <b>&gt;1% BMI loss</b><br>n=420 | <b>Stable BMI<sup>a</sup></b><br>n=402 | <b>&gt;1% BMI gain</b><br>n=247 | <b>per 1% increment</b><br>n=1069 |
| <b>Macrovascular complications</b> |                                 |                                        |                                 |                                   |
| No. of cases / person-years        | 31 / 4709.4                     | 23 / 4223.7                            | 12 / 2632.3                     | 66 / 11,568.7                     |
| Model 1                            | 1.27 (0.72, 2.23)               | 1.00 (Ref.)                            | 0.81 (0.38, 1.70)               | 0.92 (0.83, 1.02)                 |
| Model 2                            | 1.23 (0.69, 2.21)               | 1.00 (Ref.)                            | 0.84 (0.40, 1.77)               | 0.94 (0.85, 1.03)                 |
| <b>Microvascular complications</b> |                                 |                                        |                                 |                                   |
| No. of cases / person-years        | 110 / 4709.4                    | 134 / 4223.7                           | 70 / 2632.3                     | 314 / 11,568.7                    |
| Model 1                            | 0.65 (0.50, 0.84)               | 1.00 (Ref.)                            | 0.95 (0.71, 1.26)               | 1.06 (1.02, 1.11)                 |
| Model 2                            | 0.61 (0.46, 0.80)               | 1.00 (Ref.)                            | 0.87 (0.64, 1.18)               | 1.05 (1.00, 1.10)                 |
| <b>Kidney disease</b>              |                                 |                                        |                                 |                                   |
| No. of cases / person-years        | 49 / 4709.4                     | 67 / 4223.7                            | 37 / 2632.3                     | 153 / 11,568.7                    |
| Model 1                            | 0.56 (0.38, 0.82)               | 1.00 (Ref.)                            | 1.00 (0.65, 1.52)               | 1.06 (0.99, 1.14)                 |
| Model 2                            | 0.52 (0.35, 0.79)               | 1.00 (Ref.)                            | 0.91 (0.58, 1.42)               | 1.05 (0.97, 1.13)                 |
| <b>Neuropathy</b>                  |                                 |                                        |                                 |                                   |
| No. of cases / person-years        | 57 / 4709.4                     | 66 / 4223.7                            | 29 / 2632.3                     | 152 / 11,568.7                    |
| Model 1                            | 0.72 (0.49, 1.05)               | 1.00 (Ref.)                            | 0.80 (0.52, 1.22)               | 1.05 (0.99, 1.11)                 |
| Model 2                            | 0.69 (0.47, 1.01)               | 1.00 (Ref.)                            | 0.77 (0.49, 1.20)               | 1.04 (0.98, 1.11)                 |

Table presents combined rounded values from the ten imputation datasets. Model 1: adjusted for age, sex and pre-diagnosis BMI; Model 2: Model 1 + education, smoking status change, smoking duration at pre-diagnosis, smoking duration change, physical activity at pre-diagnosis, physical activity change, alcohol consumption at pre-diagnosis, alcohol consumption change, MedPyr score, lipid-lowering medication, antihypertensive medication, glucose-lowering medication. <sup>a</sup>Stable BMI was defined as  $\leq 1\%$  BMI gain/loss. 14 participants did not have a follow-up after diabetes diagnosis. For models of total complications 11 participants were further excluded because they developed a complication between diabetes diagnosis and post-diagnosis BMI measurement; for macrovascular complications 7 participants; for microvascular complications 4 participants; for kidney disease 3 participants; for neuropathy 2 participants.

## ESM Figures

**ESM Fig. 1** Flow chart of study sample derivation and number of microvascular and macrovascular complications of diabetes

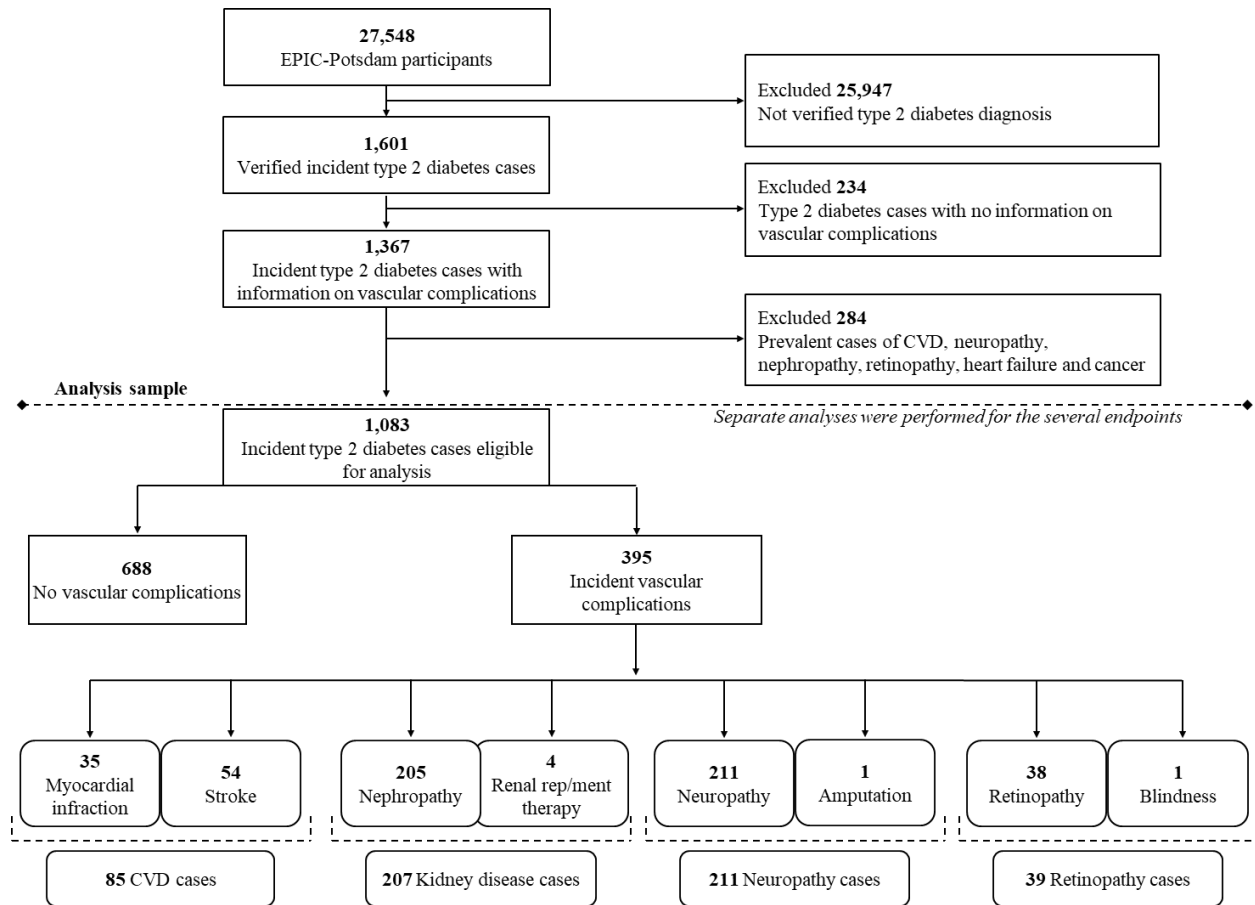

EPIC, European Prospective Investigation into Cancer and Nutrition; CVD, Cardiovascular Disease

Incident macrovascular complications (CVD), n=85

Incident microvascular complications (kidney disease, neuropathy, retinopathy), n=347

Participants with both macrovascular and microvascular complications, n=37; Participants with one complication, n=271; Participants with two complications, n=104; Participants with three complications, n=20.

ESM Fig. 2 Study design

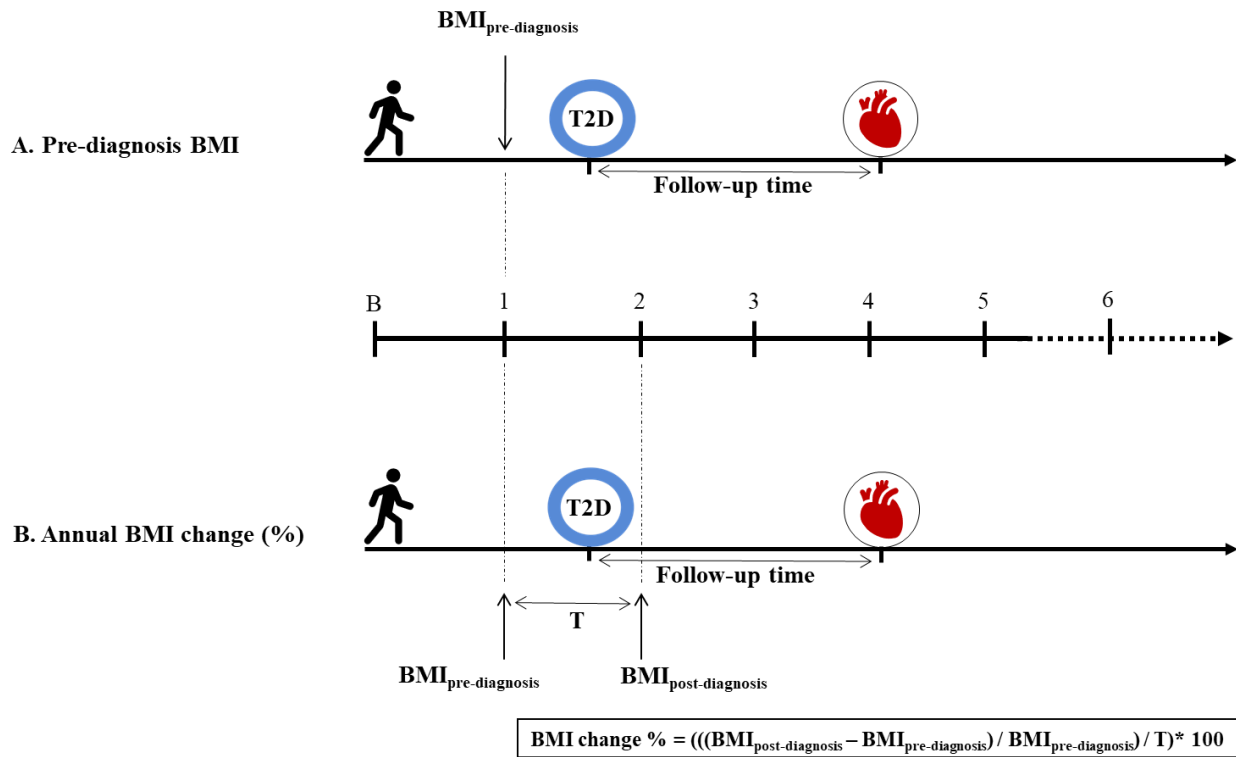

The line in the middle represents the timeline of the European Prospective Investigation into Cancer and Nutrition (EPIC)-Potsdam study, where: B=Baseline, 1 to 6=Follow-up round 1 to 6. The figure visualises the design of the current study, presenting the example of one participant who developed type 2 diabetes between follow-up 1 and 2 of the EPIC-Potsdam study, and was diagnosed with a macrovascular complication at around follow-up 4. For the present study, the follow-up time was defined as the time between type 2 diabetes diagnosis and diagnosis of the corresponding vascular disease or date of the last examination by the physicians. For the analysis on annual BMI change, participants who developed complications between diabetes diagnosis and post-diagnosis BMI measurement were excluded (n=11).

**ESM Fig. 3** Association between relative BMI change per year and risk of microvascular and macrovascular complications of diabetes. **(a)** Total vascular complications. **(b)** Macrovascular complications. **(c)** Microvascular complications. **(d)** Kidney disease. **(e)** Neuropathy.

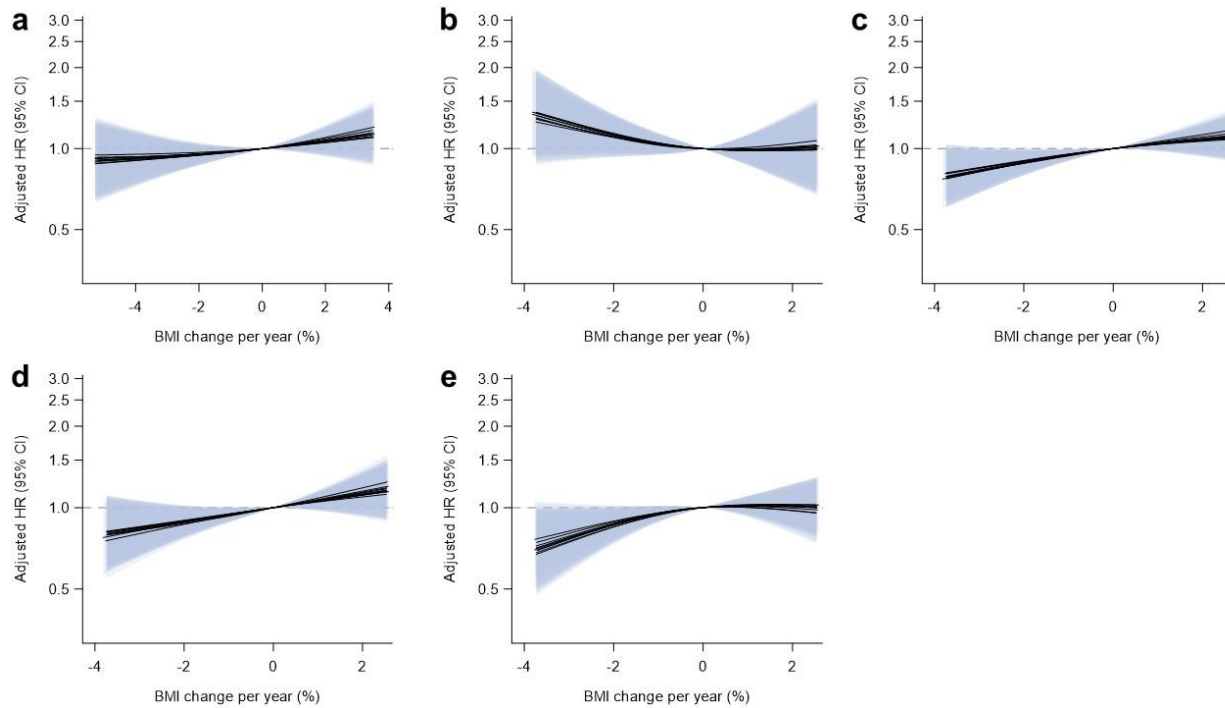

Relative annual BMI change was assessed as a continuous variable using restricted cubic spline regression, adjusted for age, sex, BMI at diabetes diagnosis, education, smoking status change, smoking duration at pre-diagnosis, smoking duration change, physical activity at pre-diagnosis, physical activity change, alcohol consumption at pre-diagnosis, alcohol consumption change, MedPyr score, lipid-lowering medication, antihypertensive medication, glucose-lowering medication. Splines (black lines) and 95% CIs (blue shading) from ten imputation datasets are shown. Knot placement was 5th, 50th and 95th percentile. BMI change of 0% served as reference. Test for nonlinearity: Total complications,  $p=0.73$ ; Macrovascular complications,  $p=0.37$ ; Microvascular complications,  $p=0.89$ ; Kidney disease,  $p=0.66$ ; Neuropathy,  $p=0.18$ .
